# Supplementary material
Source: PubMed Central journal article supplement (PMC9681967)
Supplement: 12687_2022_612_MOESM2_ESM.pdf [file 12687_2022_612_MOESM2_ESM.pdf]

# Parents' perspectives on the use of children's facial images for research and diagnosis: a survey

Lize Schoeman<sup>1</sup>; Engela M. Honey<sup>1</sup>; Helen Malherbe<sup>1,2</sup>; Vinet Coetzee<sup>1</sup>

<sup>1</sup>Department of Biochemistry, Genetics and Microbiology, University of Pretoria, Pretoria, South Africa

<sup>2</sup>Rare Diseases South Africa NPC

Corresponding author: Lize Schoeman

[lize.schoeman@me.com](mailto:lize.schoeman@me.com)

Journal of Community Genetics

## Online Resource 2

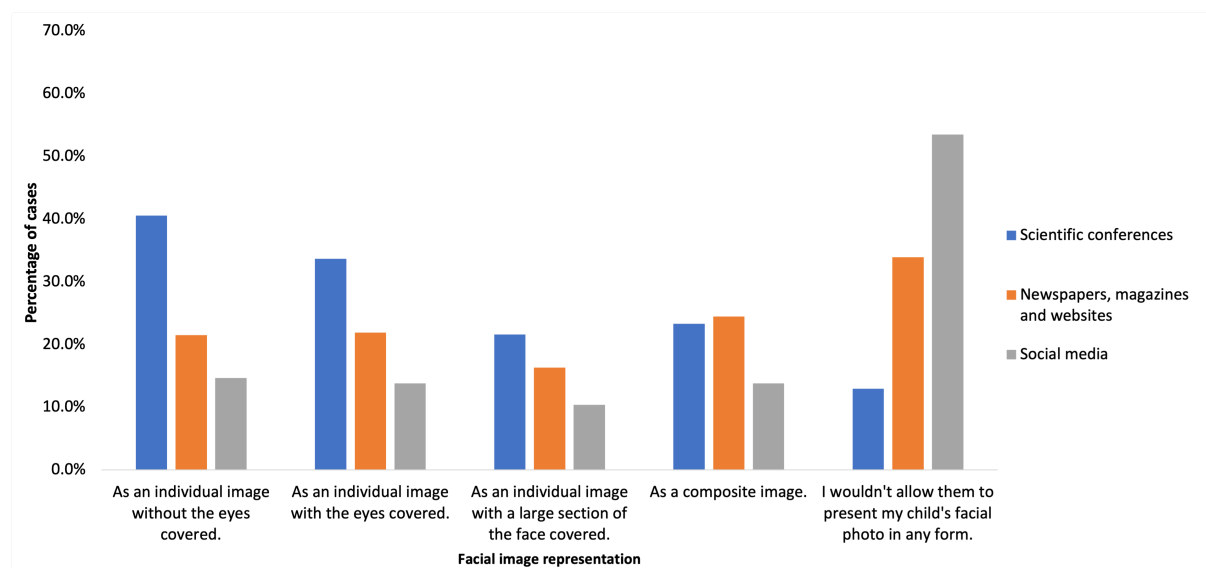

**Fig. 6** Attitudes towards publication of facial images of parents with children affected with CDs and parents of unaffected children
