# Supplementary material
Source: PubMed Central journal article supplement (PMC9681967)
Supplement: 12687_2022_612_MOESM4_ESM.pdf [file 12687_2022_612_MOESM4_ESM.pdf]

# Parents' perspectives on the use of children's facial images for research and diagnosis: a survey

Lize Schoeman<sup>1</sup>; Engela M. Honey<sup>1</sup>; Helen Malherbe<sup>1,2</sup>; Vinet Coetzee<sup>1</sup>

<sup>1</sup>Department of Biochemistry, Genetics and Microbiology, University of Pretoria, Pretoria, South Africa

<sup>2</sup>Rare Diseases South Africa NPC

Corresponding author: Lize Schoeman

[lize.schoeman@me.com](mailto:lize.schoeman@me.com)

Journal of Community Genetics

Online Resource 4

All respondents vs only mothers results

Collection of facial photographs

**Table 1:** Attitudes toward the collection of facial photographs of all respondents vs only mothers.

|                           | <b>All respondents (n=149)<br/>% of cases</b> | <b>Mothers only (n=131)<br/>% of cases</b> |
|---------------------------|-----------------------------------------------|--------------------------------------------|
| <b>Definitely yes</b>     | 34.9                                          | 35.1                                       |
| <b>Probably yes</b>       | 37.6                                          | 35.9                                       |
| <b>Might or might not</b> | 6.0                                           | 6.9                                        |
| <b>Probably not</b>       | 16.8                                          | 16.8                                       |
| <b>Definitely not</b>     | 4.7                                           | 5.3                                        |

Based on available evidence, we do not expect a major difference between all respondent's and only mothers' views ( $\chi^2(4) = 0.89, p > 0.90$ ).

## Storage of facial photographs

**Table 2:** Attitudes toward the storage of facial photographs of all respondents vs only mothers.

| A secure database that only the original researchers can access                                                                                     |                                              |                                           |
|-----------------------------------------------------------------------------------------------------------------------------------------------------|----------------------------------------------|-------------------------------------------|
|                                                                                                                                                     | <b>All respondents (n=116)</b><br>% of cases | <b>Mothers only (n=101)</b><br>% of cases |
| <b>Definitely yes</b>                                                                                                                               | 56.9                                         | 55.4                                      |
| <b>Probably yes</b>                                                                                                                                 | 35.3                                         | 35.6                                      |
| <b>Might or might not</b>                                                                                                                           | 3.4                                          | 4.0                                       |
| <b>Probably not</b>                                                                                                                                 | 2.6                                          | 3.0                                       |
| <b>Definitely not</b>                                                                                                                               | 1.7                                          | 2.0                                       |
| Based on available evidence, we do not expect a major difference between all respondent's and only mothers' views ( $\chi^2(1) = 0.24, p > 0.5$ ).  |                                              |                                           |
| A secure database that other pre-approved researchers can access                                                                                    |                                              |                                           |
|                                                                                                                                                     | <b>All respondents (n=112)</b><br>% of cases | <b>Mothers only (n=97)</b><br>% of cases  |
| <b>Definitely yes</b>                                                                                                                               | 38.4                                         | 40.2                                      |
| <b>Probably yes</b>                                                                                                                                 | 41.1                                         | 38.1                                      |
| <b>Might or might not</b>                                                                                                                           | 9.8                                          | 11.3                                      |
| <b>Probably not</b>                                                                                                                                 | 5.4                                          | 5.2                                       |
| <b>Definitely not</b>                                                                                                                               | 5.4                                          | 5.2                                       |
| Based on available evidence, we do not expect a major difference between all respondent's and only mothers' views ( $\chi^2(4) = 0.55, p > 0.95$ ). |                                              |                                           |
| A secure database that other researchers and/or doctors, but not the general public, can access                                                     |                                              |                                           |
|                                                                                                                                                     | <b>All respondents (n=114)</b><br>% of cases | <b>Mothers only (n=98)</b><br>% of cases  |
| <b>Definitely yes</b>                                                                                                                               | 36.0                                         | 36.7                                      |
| <b>Probably yes</b>                                                                                                                                 | 37.7                                         | 36.7                                      |
| <b>Might or might not</b>                                                                                                                           | 11.4                                         | 12.2                                      |
| <b>Probably not</b>                                                                                                                                 | 9.6                                          | 10.2                                      |
| <b>Definitely not</b>                                                                                                                               | 5.3                                          | 4.1                                       |
| Based on available evidence, we do not expect a major difference between all respondent's and only mothers' views ( $\chi^2(4) = 0.41, p > 0.95$ ). |                                              |                                           |
| A publicly available database                                                                                                                       |                                              |                                           |
|                                                                                                                                                     | <b>All respondents (n=108)</b><br>% of cases | <b>Mothers only (n=94)</b><br>% of cases  |
| <b>Definitely yes</b>                                                                                                                               | 7.4                                          | 7.4                                       |
| <b>Probably yes</b>                                                                                                                                 | 6.5                                          | 6.4                                       |
| <b>Might or might not</b>                                                                                                                           | 7.4                                          | 7.4                                       |
| <b>Probably not</b>                                                                                                                                 | 22.2                                         | 22.3                                      |
| <b>Definitely not</b>                                                                                                                               | 56.5                                         | 56.4                                      |
| Based on available evidence, we do not expect a major difference between all respondent's and only mothers' views ( $\chi^2(4) = 0.00, p > 0.99$ ). |                                              |                                           |

## Use of facial photographs

**Table 3:** Attitudes toward the use of facial photographs of all respondents vs only mothers.

| The original study that you signed up for                                                                                                           |                                               |                                            |
|-----------------------------------------------------------------------------------------------------------------------------------------------------|-----------------------------------------------|--------------------------------------------|
|                                                                                                                                                     | <b>All respondents (n=115)<br/>% of cases</b> | <b>Mothers only (n=100)<br/>% of cases</b> |
| <b>Definitely yes</b>                                                                                                                               | 56.5                                          | 55.0                                       |
| <b>Probably yes</b>                                                                                                                                 | 39.1                                          | 40.0                                       |
| <b>Might or might not</b>                                                                                                                           | 3.5                                           | 4.0                                        |
| <b>Probably not</b>                                                                                                                                 | 0.0                                           | 0.0                                        |
| <b>Definitely not</b>                                                                                                                               | 0.9                                           | 1.0                                        |
| Based on available evidence, we do not expect a major difference between all respondent's and only mothers' views ( $\chi^2(2) = 0.14, p > 0.9$ ).  |                                               |                                            |
| Other similar research studies also aimed at improving diagnosis that received ethical approval                                                     |                                               |                                            |
|                                                                                                                                                     | <b>All respondents (n=113)<br/>% of cases</b> | <b>Mothers only (n=97)<br/>% of cases</b>  |
| <b>Definitely yes</b>                                                                                                                               | 38.1                                          | 37.1                                       |
| <b>Probably yes</b>                                                                                                                                 | 45.1                                          | 45.4                                       |
| <b>Might or might not</b>                                                                                                                           | 8.8                                           | 9.3                                        |
| <b>Probably not</b>                                                                                                                                 | 4.4                                           | 5.2                                        |
| <b>Definitely not</b>                                                                                                                               | 3.5                                           | 3.1                                        |
| Based on available evidence, we do not expect a major difference between all respondent's and only mothers' views ( $\chi^2(3) = 0.08, p > 0.99$ ). |                                               |                                            |
| Any research study that received ethical approval                                                                                                   |                                               |                                            |
|                                                                                                                                                     | <b>All respondents (n=110)<br/>% of cases</b> | <b>Mothers only (n=95)<br/>% of cases</b>  |
| <b>Definitely yes</b>                                                                                                                               | 21.8                                          | 22.1                                       |
| <b>Probably yes</b>                                                                                                                                 | 36.4                                          | 33.7                                       |
| <b>Might or might not</b>                                                                                                                           | 28.2                                          | 29.5                                       |
| <b>Probably not</b>                                                                                                                                 | 8.2                                           | 9.5                                        |
| <b>Definitely not</b>                                                                                                                               | 5.5                                           | 5.3                                        |
| Based on available evidence, we do not expect a major difference between all respondent's and only mothers' views ( $\chi^2(4) = 0.48, p > 0.95$ ). |                                               |                                            |

**Table 4:** Attitudes toward the publication of facial photographs in academic journals of all respondents vs only mothers.

| Without their eyes covered                                                                                                                          |                                       |                                    |
|-----------------------------------------------------------------------------------------------------------------------------------------------------|---------------------------------------|------------------------------------|
|                                                                                                                                                     | All respondents (n=117)<br>% of cases | Mothers only (n=101)<br>% of cases |
| Definitely yes                                                                                                                                      | 21.4                                  | 22.8                               |
| Probably yes                                                                                                                                        | 29.9                                  | 28.7                               |
| Might or might not                                                                                                                                  | 16.2                                  | 15.8                               |
| Probably not                                                                                                                                        | 17.1                                  | 15.8                               |
| Definitely not                                                                                                                                      | 15.4                                  | 16.8                               |
| Based on available evidence, we do not expect a major difference between all respondent's and only mothers' views ( $\chi^2(4) = 0.38, p > 0.95$ ). |                                       |                                    |
| With their eyes covered                                                                                                                             |                                       |                                    |
|                                                                                                                                                     | All respondents (n=115)<br>% of cases | Mothers only (n=99)<br>% of cases  |
| Definitely yes                                                                                                                                      | 20.0                                  | 18.2                               |
| Probably yes                                                                                                                                        | 33.9                                  | 34.3                               |
| Might or might not                                                                                                                                  | 20.0                                  | 20.2                               |
| Probably not                                                                                                                                        | 13.9                                  | 14.1                               |
| Definitely not                                                                                                                                      | 12.2                                  | 13.1                               |
| Based on available evidence, we do not expect a major difference between all respondent's and only mothers' views ( $\chi^2(4) = 0.24, p > 0.99$ ). |                                       |                                    |
| With large parts of their face covered                                                                                                              |                                       |                                    |
|                                                                                                                                                     | All respondents (n=115)<br>% of cases | Mothers only (n=99)<br>% of cases  |
| Definitely yes                                                                                                                                      | 27.0                                  | 26.3                               |
| Probably yes                                                                                                                                        | 33.0                                  | 32.3                               |
| Might or might not                                                                                                                                  | 15.7                                  | 16.2                               |
| Probably not                                                                                                                                        | 11.3                                  | 12.1                               |
| Definitely not                                                                                                                                      | 13.0                                  | 13.1                               |
| Based on available evidence, we do not expect a major difference between all respondent's and only mothers' views ( $\chi^2(4) = 0.11, p > 0.99$ ). |                                       |                                    |
| As a composite image                                                                                                                                |                                       |                                    |
|                                                                                                                                                     | All respondents (n=118)<br>% of cases | Mothers only (n=102)<br>% of cases |
| Definitely yes                                                                                                                                      | 24.6                                  | 26.5                               |
| Probably yes                                                                                                                                        | 41.5                                  | 38.2                               |
| Might or might not                                                                                                                                  | 12.7                                  | 14.7                               |
| Probably not                                                                                                                                        | 11.9                                  | 10.8                               |
| Definitely not                                                                                                                                      | 9.3                                   | 9.0                                |
| Based on available evidence, we do not expect a major difference between all respondent's and only mothers' views ( $\chi^2(4) = 0.84, p > 0.90$ ). |                                       |                                    |

Publication on different platforms

Scientific conferences

**Table 5:** Attitudes toward the publication of facial photographs at scientific conferences of all respondents vs only mothers.

|                                                                                                                                                     | <b>All respondents (n=153)<br/>% of cases</b> | <b>Mothers only (n=131)<br/>% of cases</b> |
|-----------------------------------------------------------------------------------------------------------------------------------------------------|-----------------------------------------------|--------------------------------------------|
| <b>As an individual image without the eyes covered</b>                                                                                              | 40.5                                          | 41.0                                       |
| <b>As an individual images with the eyes covered</b>                                                                                                | 33.6                                          | 34.0                                       |
| <b>As an individual image with large parts of the face covered</b>                                                                                  | 21.6                                          | 21.0                                       |
| <b>As a composite image</b>                                                                                                                         | 23.3                                          | 25.0                                       |
| <b>I would not allow them to present my child's facial photos in any form</b>                                                                       | 12.9                                          | 10.0                                       |
| Based on available evidence, we do not expect a major difference between all respondent's and only mothers' views ( $\chi^2(4) = 0.80, p > 0.90$ ). |                                               |                                            |

Newspapers, magazines, and websites

**Table 6:** Attitudes toward the publication of facial photographs in newspapers, magazines, and websites of all respondents vs only mothers.

|                                                                                                                                                     | <b>All respondents (n=138)<br/>% of cases</b> | <b>Mothers only (n=122)<br/>% of cases</b> |
|-----------------------------------------------------------------------------------------------------------------------------------------------------|-----------------------------------------------|--------------------------------------------|
| <b>As an individual image without the eyes covered</b>                                                                                              | 21.5                                          | 21.4                                       |
| <b>As an individual images with the eyes covered</b>                                                                                                | 21.9                                          | 22.9                                       |
| <b>As an individual image with large parts of the face covered</b>                                                                                  | 16.3                                          | 16.4                                       |
| <b>As a composite image</b>                                                                                                                         | 24.5                                          | 26.9                                       |
| <b>I would not allow them to present my child's facial photos in any form</b>                                                                       | 33.9                                          | 33.4                                       |
| Based on available evidence, we do not expect a major difference between all respondent's and only mothers' views ( $\chi^2(4) = 0.29, p > 0.99$ ). |                                               |                                            |

Social media

**Table 7:** Attitudes toward the publication of facial photographs on social media of all respondents vs only mothers.

|                                                                                                                                                     | <b>All respondents (n=123)<br/>% of cases</b> | <b>Mothers only (n=107)<br/>% of cases</b> |
|-----------------------------------------------------------------------------------------------------------------------------------------------------|-----------------------------------------------|--------------------------------------------|
| <b>As an individual image without the eyes covered</b>                                                                                              | 14.7                                          | 14.0                                       |
| <b>As an individual images with the eyes covered</b>                                                                                                | 13.8                                          | 16.0                                       |
| <b>As an individual image with large parts of the face covered</b>                                                                                  | 10.3                                          | 9.0                                        |
| <b>As a composite image</b>                                                                                                                         | 13.8                                          | 16.0                                       |
| <b>I would not allow them to present my child's facial photos in any form</b>                                                                       | 53.4                                          | 52.0                                       |
| Based on available evidence, we do not expect a major difference between all respondent's and only mothers' views ( $\chi^2(4) = 0.94, p > 0.90$ ). |                                               |                                            |

## All respondents vs only Caucasian individuals results

### Collection of facial photographs

**Table 8:** Attitudes toward the collection of facial photographs of all respondents vs only Caucasian respondents.

|                                                                                                                                                     | <b>All respondents (n=149)<br/>% of cases</b> | <b>Caucasian respondents<br/>only (n=128)<br/>% of cases</b> |
|-----------------------------------------------------------------------------------------------------------------------------------------------------|-----------------------------------------------|--------------------------------------------------------------|
| <b>Definitely yes</b>                                                                                                                               | 34.9                                          | 36.7                                                         |
| <b>Probably yes</b>                                                                                                                                 | 37.6                                          | 38.3                                                         |
| <b>Might or might not</b>                                                                                                                           | 6.0                                           | 6.3                                                          |
| <b>Probably not</b>                                                                                                                                 | 16.8                                          | 14.8                                                         |
| <b>Definitely not</b>                                                                                                                               | 4.7                                           | 3.9                                                          |
| Based on available evidence, we do not expect a major difference between all respondent's and only mothers' views ( $\chi^2(4) = 0.50, p > 0.95$ ). |                                               |                                                              |

## Storage of facial photographs

**Table 9:** Attitudes toward the storage of facial photographs of all respondents vs only Caucasian respondents.

| A secure database that only the original researchers can access                                                                                     |                                               |                                                              |
|-----------------------------------------------------------------------------------------------------------------------------------------------------|-----------------------------------------------|--------------------------------------------------------------|
|                                                                                                                                                     | <b>All respondents (n=116)<br/>% of cases</b> | <b>Caucasian respondents<br/>only (n=102)<br/>% of cases</b> |
| <b>Definitely yes</b>                                                                                                                               | 56.9                                          | 56.9                                                         |
| <b>Probably yes</b>                                                                                                                                 | 35.3                                          | 36.3                                                         |
| <b>Might or might not</b>                                                                                                                           | 3.4                                           | 2.0                                                          |
| <b>Probably not</b>                                                                                                                                 | 2.6                                           | 2.9                                                          |
| <b>Definitely not</b>                                                                                                                               | 1.7                                           | 2.0                                                          |
| Based on available evidence, we do not expect a major difference between all respondent's and only mothers' views ( $\chi^2(2) = 0.11, p > 0.90$ ). |                                               |                                                              |
| A secure database that other pre-approved researchers can access                                                                                    |                                               |                                                              |
|                                                                                                                                                     | <b>All respondents (n=112)<br/>% of cases</b> | <b>Caucasian respondents<br/>only (n=98)<br/>% of cases</b>  |
| <b>Definitely yes</b>                                                                                                                               | 38.4                                          | 37.8                                                         |
| <b>Probably yes</b>                                                                                                                                 | 41.1                                          | 42.9                                                         |
| <b>Might or might not</b>                                                                                                                           | 9.8                                           | 8.2                                                          |
| <b>Probably not</b>                                                                                                                                 | 5.4                                           | 6.1                                                          |
| <b>Definitely not</b>                                                                                                                               | 5.4                                           | 5.1                                                          |
| Based on available evidence, we do not expect a major difference between all respondent's and only mothers' views ( $\chi^2(4) = 0.46, p > 0.95$ ). |                                               |                                                              |
| A secure database that other researchers and/or doctors, but not the general public, can access                                                     |                                               |                                                              |
|                                                                                                                                                     | <b>All respondents (n=114)<br/>% of cases</b> | <b>Caucasian respondents<br/>only (n=100)<br/>% of cases</b> |
| <b>Definitely yes</b>                                                                                                                               | 36.0                                          | 35.0                                                         |
| <b>Probably yes</b>                                                                                                                                 | 37.7                                          | 37.0                                                         |
| <b>Might or might not</b>                                                                                                                           | 11.4                                          | 12.0                                                         |
| <b>Probably not</b>                                                                                                                                 | 9.6                                           | 11.0                                                         |
| <b>Definitely not</b>                                                                                                                               | 5.3                                           | 5.0                                                          |
| Based on available evidence, we do not expect a major difference between all respondent's and only mothers' views ( $\chi^2(4) = 0.29, p > 0.99$ ). |                                               |                                                              |
| A publicly available database                                                                                                                       |                                               |                                                              |
|                                                                                                                                                     | <b>All respondents (n=108)<br/>% of cases</b> | <b>Caucasian respondents<br/>only (n=95)<br/>% of cases</b>  |
| <b>Definitely yes</b>                                                                                                                               | 7.4                                           | 7.4                                                          |
| <b>Probably yes</b>                                                                                                                                 | 6.5                                           | 4.2                                                          |
| <b>Might or might not</b>                                                                                                                           | 7.4                                           | 7.4                                                          |
| <b>Probably not</b>                                                                                                                                 | 22.2                                          | 22.1                                                         |



|                                                                                                                                                     |      |      |
|-----------------------------------------------------------------------------------------------------------------------------------------------------|------|------|
| <b>Definitely not</b>                                                                                                                               | 56.5 | 58.9 |
| Based on available evidence, we do not expect a major difference between all respondent's and only mothers' views ( $\chi^2(4) = 0.92, p > 0.90$ ). |      |      |

## Use of facial photographs

**Table 10:** Attitudes toward the use of facial photographs of all respondents vs only Caucasian respondents.

| The original study that you signed up for                                                                                                           |                                               |                                                              |
|-----------------------------------------------------------------------------------------------------------------------------------------------------|-----------------------------------------------|--------------------------------------------------------------|
|                                                                                                                                                     | <b>All respondents (n=115)<br/>% of cases</b> | <b>Caucasian respondents<br/>only (n=101)<br/>% of cases</b> |
| <b>Definitely yes</b>                                                                                                                               | 56.5                                          | 58.4                                                         |
| <b>Probably yes</b>                                                                                                                                 | 39.1                                          | 38.6                                                         |
| <b>Might or might not</b>                                                                                                                           | 3.5                                           | 2.0                                                          |
| <b>Probably not</b>                                                                                                                                 | 0.0                                           | 0.0                                                          |
| <b>Definitely not</b>                                                                                                                               | 0.9                                           | 1.0                                                          |
| Based on available evidence, we do not expect a major difference between all respondent's and only mothers' views ( $\chi^2(2) = 0.52, p > 0.75$ ). |                                               |                                                              |
| Other similar research studies also aimed at improving diagnosis that received ethical approval                                                     |                                               |                                                              |
|                                                                                                                                                     | <b>All respondents (n=113)<br/>% of cases</b> | <b>Caucasian respondents<br/>only (n=100)<br/>% of cases</b> |
| <b>Definitely yes</b>                                                                                                                               | 38.1                                          | 38.0                                                         |
| <b>Probably yes</b>                                                                                                                                 | 45.1                                          | 47.0                                                         |
| <b>Might or might not</b>                                                                                                                           | 8.8                                           | 7.0                                                          |
| <b>Probably not</b>                                                                                                                                 | 4.4                                           | 4.0                                                          |
| <b>Definitely not</b>                                                                                                                               | 3.5                                           | 4.0                                                          |
| Based on available evidence, we do not expect a major difference between all respondent's and only mothers' views ( $\chi^2(3) = 0.45, p > 0.90$ ). |                                               |                                                              |
| Any research study that received ethical approval                                                                                                   |                                               |                                                              |
|                                                                                                                                                     | <b>All respondents (n=110)<br/>% of cases</b> | <b>Caucasian respondents<br/>only (n=97)<br/>% of cases</b>  |
| <b>Definitely yes</b>                                                                                                                               | 21.8                                          | 22.7                                                         |
| <b>Probably yes</b>                                                                                                                                 | 36.4                                          | 37.1                                                         |
| <b>Might or might not</b>                                                                                                                           | 28.2                                          | 25.8                                                         |
| <b>Probably not</b>                                                                                                                                 | 8.2                                           | 8.2                                                          |
| <b>Definitely not</b>                                                                                                                               | 5.5                                           | 6.2                                                          |
| Based on available evidence, we do not expect a major difference between all respondent's and only mothers' views ( $\chi^2(4) = 0.34, p > 0.99$ ). |                                               |                                                              |

**Table 11:** Attitudes toward the publication of facial photographs in academic journals of all respondents vs only Caucasian respondents.

| Without their eyes covered                                                                                                                          |                                               |                                                          |
|-----------------------------------------------------------------------------------------------------------------------------------------------------|-----------------------------------------------|----------------------------------------------------------|
|                                                                                                                                                     | <b>All respondents (n=117)<br/>% of cases</b> | <b>Caucasian respondents only (n=103)<br/>% of cases</b> |
| <b>Definitely yes</b>                                                                                                                               | 21.4                                          | 21.4                                                     |
| <b>Probably yes</b>                                                                                                                                 | 29.9                                          | 29.1                                                     |
| <b>Might or might not</b>                                                                                                                           | 16.2                                          | 15.5                                                     |
| <b>Probably not</b>                                                                                                                                 | 17.1                                          | 17.5                                                     |
| <b>Definitely not</b>                                                                                                                               | 15.4                                          | 16.5                                                     |
| Based on available evidence, we do not expect a major difference between all respondent's and only mothers' views ( $\chi^2(4) = 0.14, p > 0.99$ ). |                                               |                                                          |
| With their eyes covered                                                                                                                             |                                               |                                                          |
|                                                                                                                                                     | <b>All respondents (n=115)<br/>% of cases</b> | <b>Caucasian respondents only (n=101)<br/>% of cases</b> |
| <b>Definitely yes</b>                                                                                                                               | 20.0                                          | 20.8                                                     |
| <b>Probably yes</b>                                                                                                                                 | 33.9                                          | 36.6                                                     |
| <b>Might or might not</b>                                                                                                                           | 20.0                                          | 17.8                                                     |
| <b>Probably not</b>                                                                                                                                 | 13.9                                          | 13.9                                                     |
| <b>Definitely not</b>                                                                                                                               | 12.2                                          | 10.9                                                     |
| Based on available evidence, we do not expect a major difference between all respondent's and only mothers' views ( $\chi^2(4) = 0.63, p > 0.95$ ). |                                               |                                                          |
| With large parts of their face covered                                                                                                              |                                               |                                                          |
|                                                                                                                                                     | <b>All respondents (n=115)<br/>% of cases</b> | <b>Caucasian respondents only (n=101)<br/>% of cases</b> |
| <b>Definitely yes</b>                                                                                                                               | 27.0                                          | 27.7                                                     |
| <b>Probably yes</b>                                                                                                                                 | 33.0                                          | 34.7                                                     |
| <b>Might or might not</b>                                                                                                                           | 15.7                                          | 14.9                                                     |
| <b>Probably not</b>                                                                                                                                 | 11.3                                          | 11.9                                                     |
| <b>Definitely not</b>                                                                                                                               | 13.0                                          | 10.9                                                     |
| Based on available evidence, we do not expect a major difference between all respondent's and only mothers' views ( $\chi^2(4) = 0.52, p > 0.95$ ). |                                               |                                                          |
| As a composite image                                                                                                                                |                                               |                                                          |
|                                                                                                                                                     | <b>All respondents (n=118)<br/>% of cases</b> | <b>Caucasian respondents only (n=103)<br/>% of cases</b> |
| <b>Definitely yes</b>                                                                                                                               | 24.6                                          | 26.2                                                     |
| <b>Probably yes</b>                                                                                                                                 | 41.5                                          | 40.8                                                     |
| <b>Might or might not</b>                                                                                                                           | 12.7                                          | 11.7                                                     |
| <b>Probably not</b>                                                                                                                                 | 11.9                                          | 11.7                                                     |
| <b>Definitely not</b>                                                                                                                               | 9.3                                           | 9.7                                                      |

Based on available evidence, we do not expect a major difference between all respondent's and only mothers' views ( $\chi^2(4) = 0.22, p > 0.99$ ).

Publication on different platforms

Scientific conferences

**Table 12:** Attitudes toward the publication of facial photographs at scientific conferences of all respondents vs only Caucasian respondents.

|                                                                                                                                                     | <b>All respondents (n=153)<br/>% of cases</b> | <b>Caucasian respondents<br/>only (n=135)<br/>% of cases</b> |
|-----------------------------------------------------------------------------------------------------------------------------------------------------|-----------------------------------------------|--------------------------------------------------------------|
| <b>As an individual image<br/>without the eyes covered</b>                                                                                          | 40.5                                          | 38.2                                                         |
| <b>As an individual images with<br/>the eyes covered</b>                                                                                            | 33.6                                          | 34.3                                                         |
| <b>As an individual image with<br/>large parts of the face<br/>covered</b>                                                                          | 21.6                                          | 21.6                                                         |
| <b>As a composite image</b>                                                                                                                         | 23.3                                          | 25.5                                                         |
| <b>I would not allow them to<br/>present my child's facial<br/>photos in any form</b>                                                               | 12.9                                          | 12.7                                                         |
| Based on available evidence, we do not expect a major difference between all respondent's and only mothers' views ( $\chi^2(4) = 0.36, p > 0.95$ ). |                                               |                                                              |

Newspapers, magazines, and websites

**Table 13:** Attitudes toward the publication of facial photographs in newspapers, magazines, and websites of all respondents vs only Caucasian respondents.

|                                                                                                                                                     | <b>All respondents (n=138)<br/>% of cases</b> | <b>Caucasian respondents<br/>only (n=122)<br/>% of cases</b> |
|-----------------------------------------------------------------------------------------------------------------------------------------------------|-----------------------------------------------|--------------------------------------------------------------|
| <b>As an individual image<br/>without the eyes covered</b>                                                                                          | 21.5                                          | 19.0                                                         |
| <b>As an individual images with<br/>the eyes covered</b>                                                                                            | 21.9                                          | 22.0                                                         |
| <b>As an individual image with<br/>large parts of the face<br/>covered</b>                                                                          | 16.3                                          | 15.6                                                         |
| <b>As a composite image</b>                                                                                                                         | 24.5                                          | 25.9                                                         |
| <b>I would not allow them to<br/>present my child's facial<br/>photos in any form</b>                                                               | 33.9                                          | 36.6                                                         |
| Based on available evidence, we do not expect a major difference between all respondent's and only mothers' views ( $\chi^2(4) = 0.62, p > 0.95$ ). |                                               |                                                              |

Social media

**Table 14:** Attitudes toward the publication of facial photographs on social media of all respondents vs only Caucasian respondents.

|                                                                                                                                                     | <b>All respondents (n=123)<br/>% of cases</b> | <b>Caucasian respondents<br/>only (n=109)<br/>% of cases</b> |
|-----------------------------------------------------------------------------------------------------------------------------------------------------|-----------------------------------------------|--------------------------------------------------------------|
| <b>As an individual image<br/>without the eyes covered</b>                                                                                          | 14.7                                          | 11.8                                                         |
| <b>As an individual images with<br/>the eyes covered</b>                                                                                            | 13.8                                          | 13.7                                                         |
| <b>As an individual image with<br/>large parts of the face<br/>covered</b>                                                                          | 10.3                                          | 9.8                                                          |
| <b>As a composite image</b>                                                                                                                         | 13.8                                          | 15.7                                                         |
| <b>I would not allow them to<br/>present my child's facial<br/>photos in any form</b>                                                               | 53.4                                          | 55.9                                                         |
| Based on available evidence, we do not expect a major difference between all respondent's and only mothers' views ( $\chi^2(4) = 0.98, p > 0.90$ ). |                                               |                                                              |
